# Supplementary material for: A highly stretchable and anti-freezing silk-based conductive hydrogel for application as a self-adhesive and transparent ionotronic skin
Source: Royal Society of Chemistry journal article supplement (doi:10.1039/d1tc01587g), 2021-01-01
Supplement: d1tc01587g1.pdf [file d1tc01587g1.pdf]

## Supporting information

### **High stretchable and anti-freezing silk-based conductive hydrogel for application of self-adhesive and transparent ionotronic skin**

*Bohua Zhao, Qianying Chen, Gaohuan Da, Jinrong Yao, Zhengzhong Shao, and Xin Chen\**

State Key Laboratory of Molecular Engineering of Polymers, Department of Macromolecular Science, Shanghai Stomatological Hospital, Laboratory of Advanced Materials, Fudan University, 220 Handan Road, Shanghai, 200433, People's Republic of China

\*Corresponding author: chenx@fudan.edu.cn

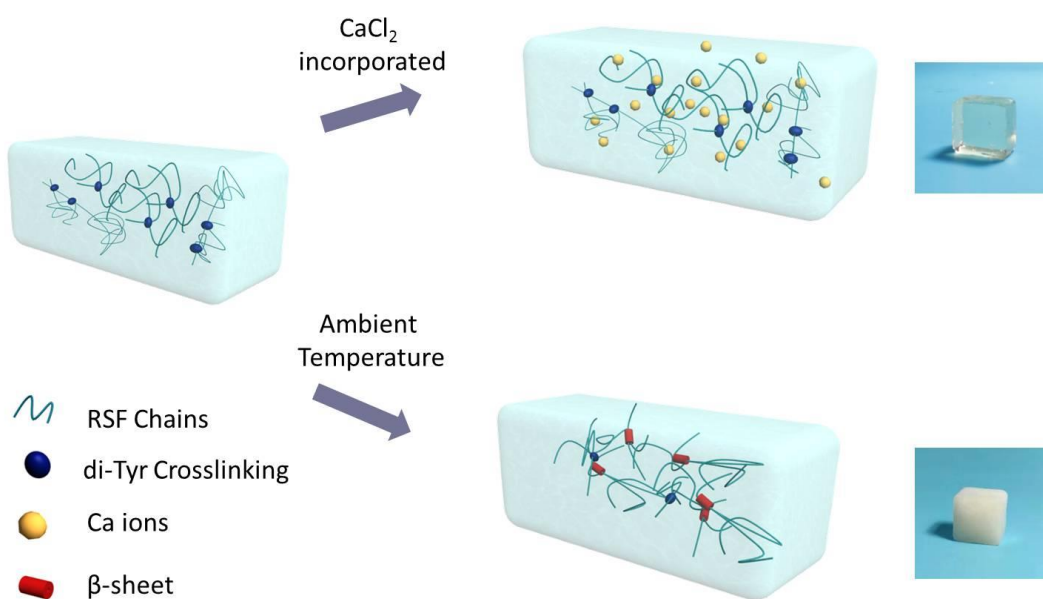

**Fig. S1.** Schematic illustration of the RSF/HRP hydrogel with or without  $\text{CaCl}_2$  incorporation.

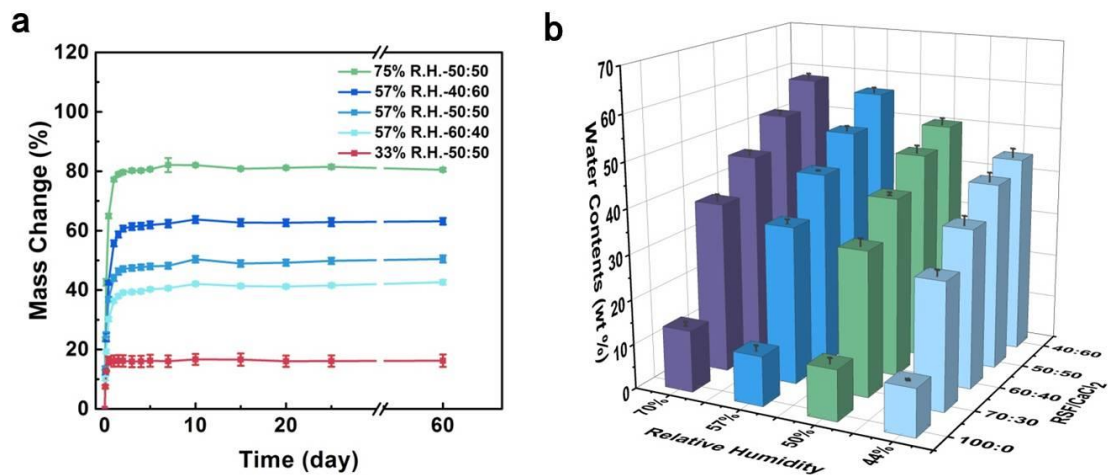

**Fig. S2.** (a) Mass change of the RSF/CaCl<sub>2</sub>/HRP hydrogels with different relative humidity. (b) Water content of the RSF/CaCl<sub>2</sub>/HRP hydrogel at different humidity and RSF/CaCl<sub>2</sub> mass ratio (n=3).

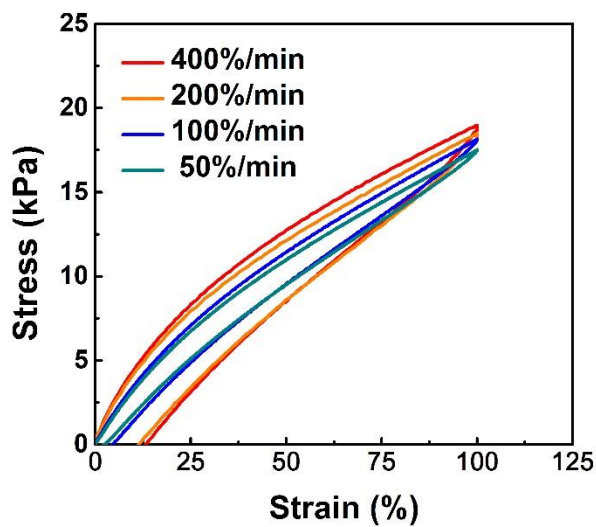

**Fig. S3** Loading-unloading curves of the RSF/CaCl<sub>2</sub>/HRP hydrogels under 100% strain at different loading-unloading rate.

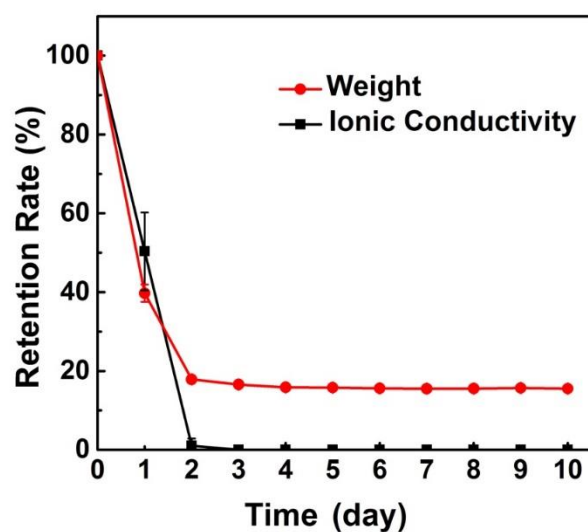

**Fig. S4.** The stability of the PAAm/SA hydrogel after long-term exposing to ambient air at 50% R.H.

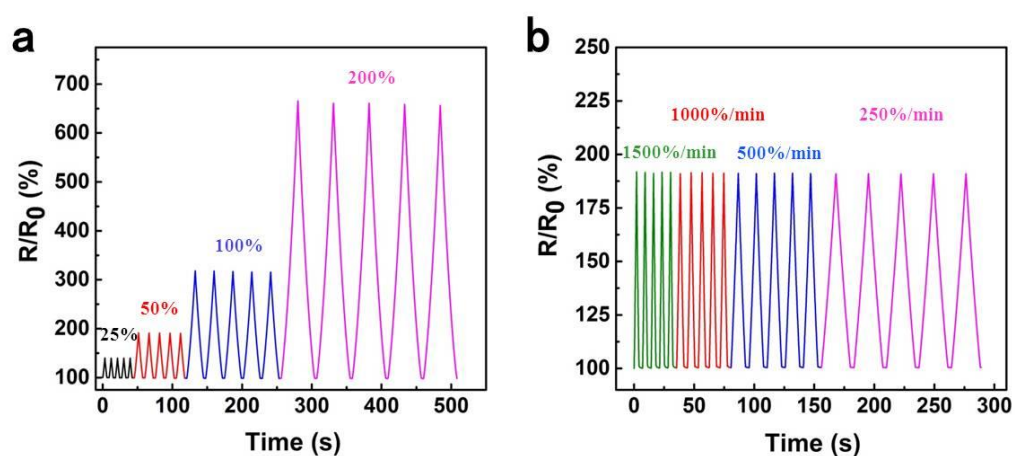

**Fig. S5.** The variation of the resistance changes of the RSF/CaCl<sub>2</sub>/HRP hydrogel as a function of the strain and loading–unloading rate. (a) Change of R/R<sub>0</sub> for 5 cycles at different strain of 25%, 50%, 100%, and 200% under a constant loading–unloading rate of 500%/min. (b) Change of R/R<sub>0</sub> for 5 cycles at different loading–unloading rate of 1500%/min, 1000%/min, 500%/min, and 250%/min under a constant strain of 50%.

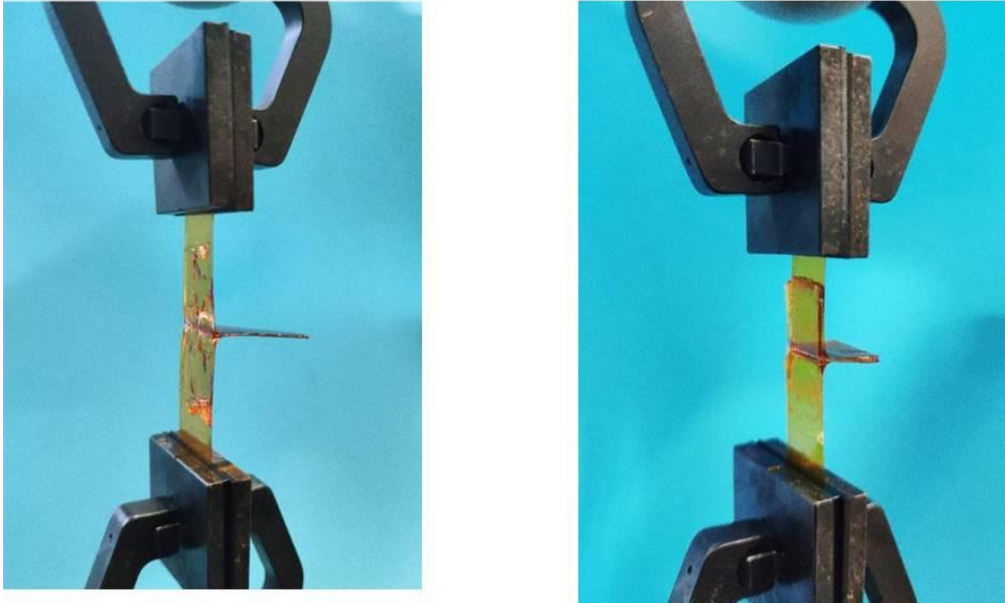

**Fig. S6.** Optical images of the peeling process. (a) RSF/CaCl<sub>2</sub> hydrogel; (b) RSF/CaCl<sub>2</sub>/HRP hydrogel.

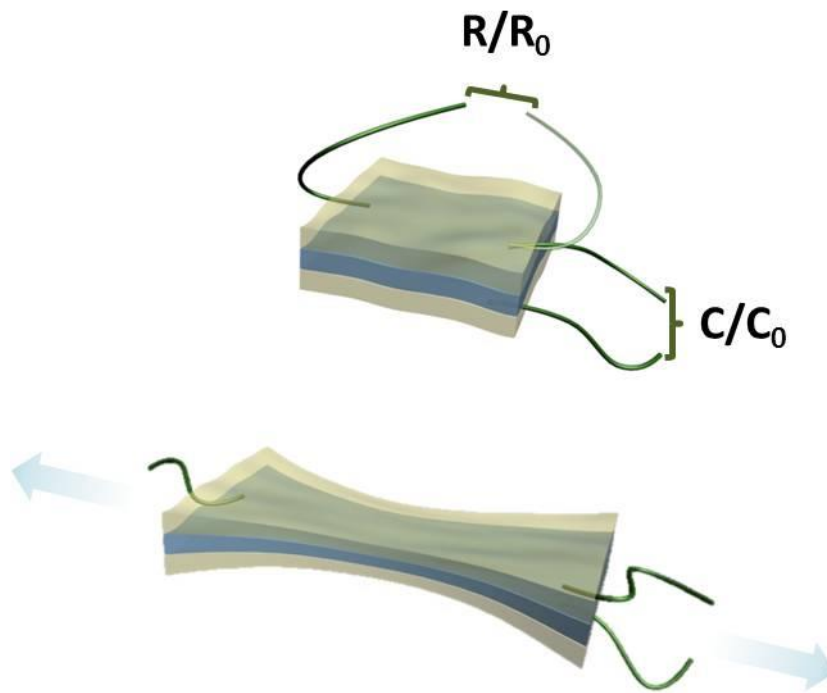

**Fig. S7.** Schematic structure of the RSF-based dual functional capacitance sensor.

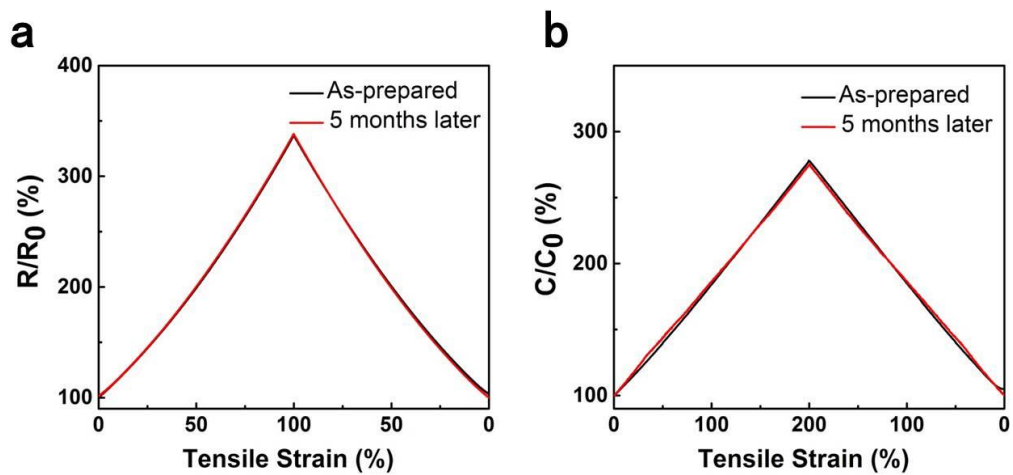

**Fig. S8.** Stability of the RSF/CaCl<sub>2</sub>/HRP hydrogel-based sensors. (a) Resistance changes. (b) Capacitance changes.

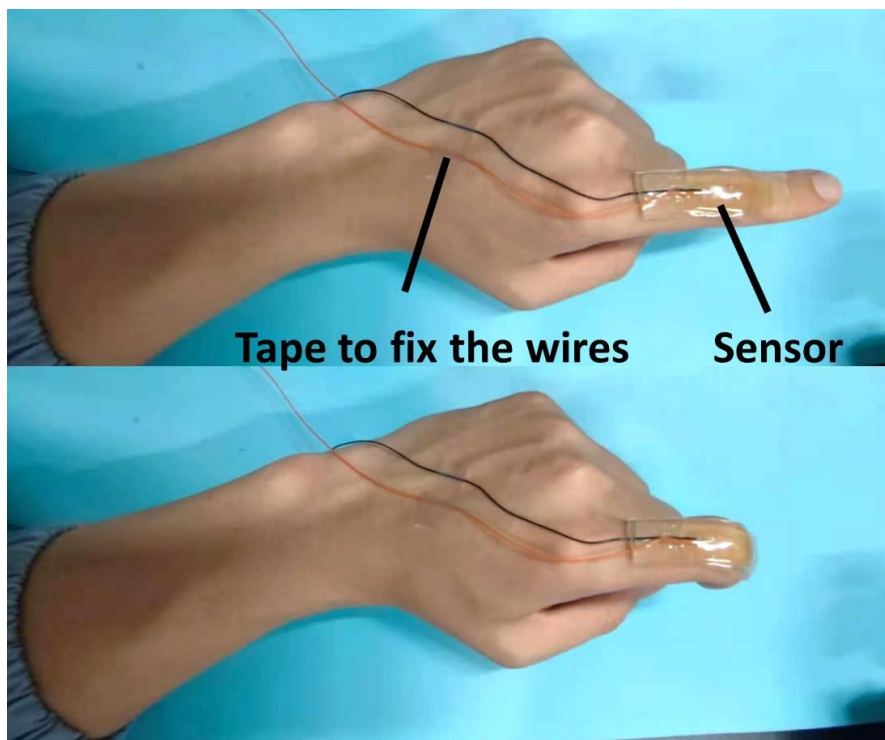

**Fig. S9.** Demonstration of a RSF hydrogel-based sensor mounting on the volunteer's finger to perform wearable sensing tests.

**Table S1.** Comparison on the multi-functionality of the hydrogel-based sensors

| Materials                        | Transparency | Self-adhe<br>-siveness | Water<br>Retention | Sensor Type                     | Working<br>ability<br>below 0 °C | Ref.         |
|----------------------------------|--------------|------------------------|--------------------|---------------------------------|----------------------------------|--------------|
| PAA/Chitosan/GO                  | Opaque       | Yes                    | Yes                | Strain                          | Yes                              | 1            |
| PAM/PDA-talc                     | Transparent  | Yes                    | No                 | Strain                          | No                               | 2            |
| PAA/TA@CNCs/PANI*                | Opaque       | Yes                    | No                 | Strain                          | No                               | 3            |
| PAA/PVA/Fe(III)                  | Transparent  | No                     | No                 | Strain/Pressure/<br>Temperature | No                               | 4            |
| Ag/TA@CNCs/PVA                   | Opaque       | Yes                    | No                 | Strain                          | No                               | 5            |
| Cellulose/ BzMe <sub>3</sub> NOH | Transparent  | No                     | No                 | Pressure/<br>Temperature        | Yes                              | 6            |
| PAM/Carrageenan                  | Transparent  | No                     | Yes                | Temperature                     | Yes                              | 7            |
| PAA/Fe(III)/PANI NFs             | Opaque       | Yes                    | Yes                | Strain/<br>Temperature          | No                               | 8            |
| PAAM/SC/CC**                     | Transparent  | Yes                    | No                 | Strain                          | No                               | 9            |
| PAAM/rGO                         | Opaque       | Yes                    | No                 | Strain                          | No                               | 10           |
| RSF/Ca(II)                       | Transparent  | Yes                    | Yes                | Strain/<br>Temperature          | Yes                              | This<br>Work |

\*TA@CNCs: tannic acid coated cellulose nanocrystals.

\*\*SC: sodium caseinate; CC: carboxymethyl chitosan.

## References:

1. S. Xia, S. Song, Y. Li and G. Gao, *J. Mater. Chem. C*, 2019, **7**, 11303-11314.
2. X. Jing, H. Mi, Y. Lin, E. Enriquez, X. Peng and L. Turng, *ACS Appl. Mater. Interfaces*, 2018, **10**, 20897-20909.
3. C. Shao, L. Meng, C. Cui and J. Yang, *J. Mater. Chem. C*, 2019, **7**, 15208-15218.
4. S. Shin, W. Lee, S. Kim, M. Lee, J. M. Koo, S. Y. Hwang, D. X. Oh and J. Park, *Chem. Eng. J.*, 2019, **371**, 452-460.
5. F. Lin, Z. Wang, Y. Shen, L. Tang, P. Zhang, Y. Wang, Y. Chen, B. Huang and B. Lu, *J. Mater. Chem. A*, 2019, **7**, 26442-26455.
6. Y. Wang, L. Zhang and A. Lu, *ACS Appl. Mater. Interfaces*, 2019, **11**, 41710-41716.
7. J. Wu, Z. Wu, Y. Wei, H. Ding, W. Huang, X. Gui, W. Shi, Y. Shen, K. Tao and X. Xie, *ACS Appl. Mater. Interfaces*, 2020, **12**, 19069-19079.
8. G. Ge, Y. Lu, X. Qu, W. Zhao, Y. Ren, W. Wang, Q. Wang, W. Huang and X. Dong, *ACS Nano*, 2020, **14**, 218-228.
9. G. Wang, Q. Zhang, Q. Wang, L. Zhou and G. Gao, *ACS Appl. Mater. Interfaces*, 2021.
10. X. Zheng, Y. Gao, X. Ren and G. Gao, *J. Mater. Chem. C*, 2021, **9**, 3343-3351.
